Printed in Great Britain

## CRAB GILL INTRA-EPITHELIAL CARBONIC ANHYDRASE PLAYS A MAJOR ROLE IN HAEMOLYMPH CO<sub>2</sub> AND CHLORIDE ION REGULATION

By LOUIS E. BURNETT, PAUL B. J. WOODSON,  
MARTHA G. RIETOW\* AND VICTORIA C. VILICICH

*Department of Biology, University of San Diego, Alcalá Park,  
San Diego, California 92110, U.S.A.*

(Received 11 September 1980)

### SUMMARY

The distribution and function of the enzyme carbonic anhydrase in the crab *Pachygrapsus crassipes* was investigated. Carbonic anhydrase was found in gill epithelial tissue but not in the haemolymph, muscle, heart, hepatopancreas or gonads of male crabs.

Enzyme activity was completely inhibited *in vitro* by  $2 \times 10^{-4}$  M sodium acetazolamide (Diamox). Radiolabelled Diamox ( $2 \times 10^{-4}$  M) in sea water was found to equilibrate with the intact crab's haemolymph within one hour.

Haemolymph CO<sub>2</sub> content, pH and chloride ion concentration were measured in crabs acclimated to different salinities and exposed to  $2 \times 10^{-4}$  M Diamox. Haemolymph CO<sub>2</sub> content increased at all salinities, especially low salinities, while pH remained unchanged, except at low salinities where it increased. Diamox impaired the regulation of haemolymph chloride at low salinities, but had no effect on chloride regulation at high salinities. Measurement of O<sub>2</sub> uptake (estimating CO<sub>2</sub> production) in crabs before and after Diamox exposure confirmed that elevated haemolymph CO<sub>2</sub> was not due to increases in tissue CO<sub>2</sub> production.

### INTRODUCTION

Considerable evidence points to an important role for gill intra-epithelial carbonic anhydrase in CO<sub>2</sub> excretion by fish (cf. recent reviews by Cameron, 1979 and by Haswell, Randall & Perry, 1980). There is also evidence that lung intra-epithelial carbonic anhydrase may be important in mammalian CO<sub>2</sub> excretion (Klocke, 1977; Effros, Chang & Silverman, 1978; Crandall & O'Brasky, 1978). By way of contrast, Aldridge & Cameron (1979) report that in *Callinectes sapidus*, a crab which is known to possess gill intra-epithelial carbonic anhydrase (Aldridge, 1977), this enzyme is unimportant to CO<sub>2</sub> excretion. Therefore, we decided to investigate the role of gill intra-epithelial carbonic anhydrase in another crab, *Pachygrapsus crassipes* (Randall).

In water-breathing species, at least part of the CO<sub>2</sub> excreted (presumably HCO<sub>3</sub><sup>-</sup>)

\* Present address: Department of Physiology and Pharmacology, University of California, San Diego, Jolla, California 92037.

is thought to be implicated in the movement of chloride ions between the animal and its environment (Cameron, 1979; Haswell *et al.*, 1980). Since mammalian erythrocyte carbonic anhydrase plays a major role in mobilizing intracellular  $\text{CO}_2$  to  $\text{HCO}_3^-$ , which in turn bidirectionally exchanges with plasma chloride (Roughton, 1964), we were interested in establishing the relation between haemolymph chloride ion regulation and gill carbonic anhydrase function in a crab which regulated haemolymph chloride concentration in both hypo- and hypersaline environments. Therefore, the effects of carbonic anhydrase inhibition by sodium acetazolamide (generic name 'Diamox') were studied over a range of external salinities where we had established that the animal could regulate its haemolymph chlorinity. The effects of carbonic anhydrase inhibition on chloride regulation, haemolymph  $\text{CO}_2$  content and haemolymph pH were investigated in crabs at different salinities.

#### MATERIALS AND METHODS

*Pachygrapsus crassipes* were collected along the rock jetties of Mission Bay, San Diego, California, and held in ten-gallon glass aquariums thermostated to  $23 \pm 1$  °C. Only male crabs weighing between 10 and 35 g were used. Crabs were fed frozen smelt three times each week, but were starved for 24 h before experimentation.

#### *Carbonic anhydrase assay*

Carbonic anhydrase activity (c.a.) was determined by following the rate of appearance of protons as the following reaction sequence proceeded to the right :

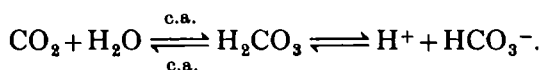

Since the uncatalysed hydration of  $\text{CO}_2$  is quite rapid at room temperature, the reaction is most easily followed at 0 °C and in the presence of considerable proton buffer capacity (Maren, 1967). Under these conditions, the pH of a reaction mixture falls at experimentally practicable rates after addition of a saturating amount of substrate ( $\text{CO}_2$ ). Any acceleration of this uncatalysed rate following addition of a sample may be attributed to the presence of a catalyst in the sample. We assume that if such catalytic activity can be abolished by addition of sodium acetazolamide (Diamox), a specific inhibitor of all carbonic anhydrases so far studied (Maren, 1967), then the catalyst in the sample is carbonic anhydrase.

Our assay buffer was 20 mM barbital (Sigma), adjusted with  $\text{H}_2\text{SO}_4$  or NaOH to pH 8.31 at 25 °C. One hundred (100)  $\mu\text{l}$  of either sample (prepared as indicated below), or assay buffer (for determining the uncatalysed rate) was added to 25 ml of assay buffer stirred in a reaction vessel thermostated to  $0 \pm 0.1$  °C. When the temperature and pH of the reaction mixture were steady, 5 ml of 0 °C distilled water, saturated with  $\text{CO}_2$  at atmospheric pressure, was rapidly injected into the reaction vessel and the drop in pH subsequent to the reaction described above was followed using an Orion Research 801 pH meter with a Sargent-Welch S-30070-10 combination pH electrode. The output of the pH meter was recorded on a Brush-Gould

20 pen recorder. The reaction rate was calculated from the time required for the pH to fall one unit. Data are expressed as:

$$\frac{\left(\frac{\text{catalysed rate}}{\text{uncatalysed rate}}\right) - 1.0}{\text{mg protein in sample}} = \text{mg}^{-1}.$$

Protein concentrations were determined using the Bio-Rad Protein Assay Kit (Bio-Rad), an adaptation based on Bradford (1976). Diamox (Lederle), was added to 25 ml of assay buffer in the reaction vessel at a concentration which provided the desired final concentration after addition of substrate. In inhibition experiments, tissue samples were allowed to equilibrate with the Diamox for 15 min before addition of substrate.

#### *Tissue preparation for enzyme assays*

Crabs acclimated to 34‰ sea water (530 mM chloride) for at least two days were killed quickly and various tissues were dissected from them. Prior to killing, haemolymph samples were taken as described below. Solid tissues were washed with cold assay buffer. All samples were then placed in 20 vol ice-cold assay buffer and disrupted using either ground glass homogenizers or sonication. In no case were the assay results different using these two types of disruption. Homogenates were then centrifuged at 100000g for one hour at 4 °C. The supernatants were decanted for assay and the pellets were resuspended by vortexing in 20 vol ice-cold assay buffer which was 1% v/v in Triton X-100 (Sigma; a non-ionic detergent). The suspension was centrifuged as before and the supernatant (presumably containing any enzyme which was tightly lipid-associated) decanted for assay. The pellet was resuspended in ice-cold assay buffer and kept for assays. Triplicate 100 µl samples of the supernatants and the pellet suspension were assayed as described above.

#### *Penetration of (<sup>3</sup>H)-Diamox in vivo*

To achieve a specific circulating concentration of Diamox in crab haemolymph by injection, the haemolymph volume must be accurately known. Since the haemolymph volume of *P. crassipes* is unknown, the possibility of Diamox penetrating crab tissues from the sea water was investigated using tritium-labelled Diamox.

Tritium-labelled Diamox was prepared according to the method of Roblin & Clapp (1950) using <sup>3</sup>H-acetic anhydride (New England Nuclear). Our product melted from 260 to 261 °C (reported: 258–259 °C; Roblin & Clapp, 1950). The physiological activity of this product was verified by showing that it was equipotent with commercial Diamox (Lederle) as an inhibitor of carbonic anhydrase (from *P. crassipes* gills) in our assay procedure. Assuming that it was 100% Diamox, the specific activity of our product was 19 × 10<sup>9</sup> cpm/mole. Radio-activities were determined by liquid scintillation counting in Aquasol-2 (New England Nuclear). All samples were counted until a statistical sampling error of 3% was achieved.

#### *Haemolymph pH, CO<sub>2</sub> content and chloride measurements*

The function of gill carbonic anhydrase was investigated by inhibiting the gill carbonic anhydrase *in vivo* with Diamox and measuring the changes in haemolymph

pH, CO<sub>2</sub> content and chloride ion concentration. Enzyme function was studied different salinities.

Crabs held in sea water of different salinities and  $23 \pm 1$  °C for a minimum of two days (Prosser, Green & Chow, 1955) were transferred to 6 l glass aquaria which were completely covered with opaque plastic. A maximum of three crabs were placed in each aquarium containing 2 l of vigorously aerated sea water of the appropriate salinity. In some tanks, Diamox was added to a final concentration of  $2 \times 10^{-4}$  M. Crabs were held in these containers for 12 h, removed individually and their haemolymph sampled from the infrabranchial sinus at the base of the third or fourth walking leg. Glass syringes containing the haemolymph samples were kept on ice and the haemolymph pH determined using a Radiometer Acid-Base Analyzer (PHM71) and pH electrode (G297/G2) thermostated to  $23 \pm 0.1$  °C. Total haemolymph CO<sub>2</sub> was measured using the method of Cameron (1971). The chloride ion concentration of haemolymph was determined in triplicate, using the titrametric method of Schales & Schales (1952) with 100 µl samples. In all cases only one haemolymph sample (~0.6 ml) was taken from each crab.

To determine if there was any specific effect of Diamox on CO<sub>2</sub> production, oxygen uptake (which estimates CO<sub>2</sub> production) was measured in crabs at three different salinities before and after 12 h exposure to  $2 \times 10^{-4}$  M Diamox. Oxygen uptake was determined using a method described by Burnett, Chambers & Coster (1980a).

## RESULTS

### *Distribution of carbonic anhydrase in P. crassipes*

The following tissues contained no detectable carbonic anhydrase activity: haemolymph, muscle, heart, hepatopancreas and male gonads. The possibility that Triton X-100 in the second supernatant and resuspended pellets was inhibiting any carbonic anhydrase present was ruled out. When a sample of gill supernatant, which exhibited carbonic anhydrase activity (described below), was made 1% v/v in Triton X-100 and then assayed, it was evident that Triton X-100 at that concentration did not inhibit *P. crassipes* carbonic anhydrase. The possibility that carbonic anhydrase in non-gill tissues was present at very low concentrations or was relatively inactive due to some endogenous inhibitor released by disruption, was made unlikely by our finding that concentrated preparations, made by pooling materials from five to ten crabs in a volume of buffer equal to what we would normally use for tissue from one crab, still exhibited no detectable carbonic anhydrase activity. Suspensions of large gill fragments exhibited no activity, suggesting that the enzyme is not located extracellularly.

Carbonic anhydrase activity in the Triton X-100 free supernatants of individual crab's gills (all gill filaments were used from both sides of each crab) ranged from 4.74 mg<sup>-1</sup> to 12.82 mg<sup>-1</sup>. The average of 18 animals was 7.75 mg<sup>-1</sup>. There appears to be no carbonic anhydrase with which membrane is tightly associated, since neither the Triton X-100 supernatant nor the resuspended pellet from the gill homogenates exhibited detectable activity. All these crabs had been acclimated to 34‰ sea water.

Table 1. *Inhibition of crab gill carbonic anhydrase activity by Diamox*

| Carbonic anhydrase activity* | Diamox concentration |
|------------------------------|----------------------|
| 8.1                          | 0                    |
| 3.24                         | $5 \times 10^{-5}$ M |
| 0                            | $2 \times 10^{-4}$ M |

\* Expressed as  $\text{mg}^{-1}$  of supernatant protein. These values were obtained from a homogenate of six sets of pooled crab gills, sonicated in 120 vol buffer.

Table 2. *Demonstration that there is no haemolymph pH effect upon the addition of Diamox at a final concentration of  $2 \times 10^{-4}$  M*

(Haemolymph samples from three crabs were pooled, gently homogenized to break up the clot and centrifuged at 2000g for 5 min. The supernatant was air-equilibrated at 23 °C and the pH measured at 5 min intervals.)

| Time (min)                                            | 0     | 5     | 10    | 15    | 20    |
|-------------------------------------------------------|-------|-------|-------|-------|-------|
| Control                                               |       |       |       |       |       |
| 9 parts haemolymph<br>1 part sea water                | 7.730 | 7.745 | 7.733 | 7.757 | 7.741 |
| Experimental                                          |       |       |       |       |       |
| 9 parts haemolymph<br>1 part sea water<br>with Diamox | 7.739 | 7.733 | 7.770 | 7.747 | 7.749 |

#### *Inhibition of gill intra-epithelial carbonic anhydrase by Diamox in vitro*

When Diamox was added to a final concentration of  $2 \times 10^{-4}$  M in the assay reaction mixture, we detected no carbonic anhydrase activity in supernatants of gill tissue (Table 1). At a concentration of  $5 \times 10^{-5}$  M, Diamox partially inhibited the carbonic anhydrase activity.

#### *Lack of a direct effect of $2 \times 10^{-4}$ M Diamox on haemolymph pH*

Since Diamox is a basic compound we thought it necessary to investigate the direct effect of Diamox at  $2 \times 10^{-4}$  M on haemolymph pH *in vitro*. When Diamox was added to haemolymph and the mixture air-equilibrated for 20 min, no change in pH was observed (Table 2).

#### *Penetration of Diamox in vivo*

To determine whether Diamox would penetrate *P. crassipes in vivo* from the external medium, and to determine how long it would take for a given haemolymph concentration to be reached in the presence of a specified water concentration, six crabs were placed in 34‰ sea water containing  $2 \times 10^{-4}$  M radioactive Diamox (3800 cpm/ml). Three crabs were removed and their haemolymph sampled at one hour and another three crabs at three hours after introduction of radioactive Diamox. Under these conditions, radiolabel in the external medium and crab haemolymph equilibrated within one hour (Table 3).

Table 3. Uptake in individual crabs of radioactive Diamox from sea water

| Time (h) in $2 \times 10^{-4}$ M radioactive Diamox<br>(3800 cpm/ml) | cpm/ml haemolymph |
|----------------------------------------------------------------------|-------------------|
| 1                                                                    | 4320              |
|                                                                      | 3760              |
|                                                                      | 3940              |
| 3                                                                    | 3600              |
|                                                                      | 4008              |
|                                                                      | 3840              |

*Diamox effects on haemolymph chloride ion concentration, CO<sub>2</sub> content, pH and crab O<sub>2</sub> uptake*

*Pachygrapsus crassipes* regulates its haemolymph chloride ion concentration over a wide range of salinities (Fig. 1). Twelve hours exposure to  $2 \times 10^{-4}$  M Diamox severely impairs the crab's ability to regulate haemolymph chloride under hypo-osmotic ( $P \ll 0.001$ ; analysis of covariance) but not under hyperosmotic conditions ( $P \sim 0.055$ ; analysis of covariance).

Diamox decreases O<sub>2</sub> uptake ( $P < 0.05$  according to a paired *t* test; Fig. 2), and by

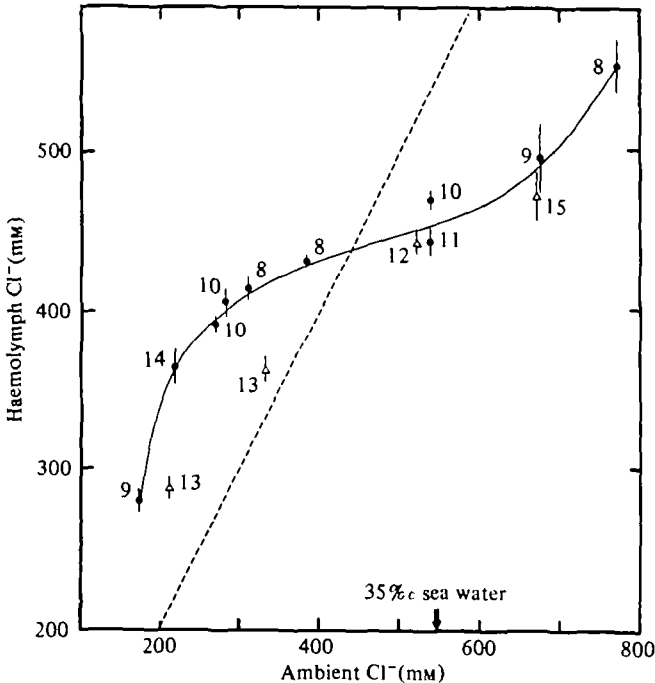

Fig. 1. Haemolymph chloride ion concentration in *Pachygrapsus crassipes* is regulated at low and high salinities and 23 °C (closed circles). Exposure to  $2 \times 10^{-4}$  M sodium acetazolamide impairs chloride regulation at low salinities but has no effect on chloride regulation at high salinities (open triangles). Data are expressed as the mean  $\pm$  standard error. The number of observations is indicated next to each data set. The dashed line is the line of identity.

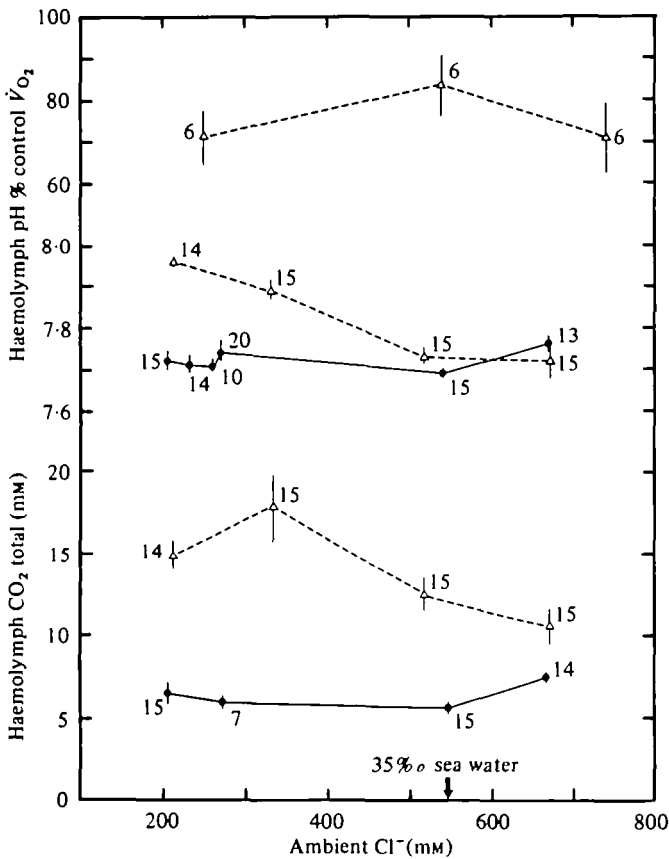

Fig. 2. Exposure to  $2 \times 10^{-4}$  M sodium acetazolamide (open triangles) depresses  $O_2$  uptake ( $\dot{V}O_2$ ), elevates haemolymph pH at low salinities and elevates haemolymph  $CO_2$  content at all salinities investigated in *Pachygrapsus crassipes* at 23 °C. Control values are depicted by closed circles. Data are expressed as the mean  $\pm$  standard error. The number of observations is indicated next to each data set.

inference decreases  $CO_2$  production assuming RQ remains constant. On the other hand, Diamox produces an elevation in haemolymph  $CO_2$  content at all salinities studied (Fig. 2); the increase is greatest at low salinities, the same salinities at which haemolymph chloride regulation was most impaired by Diamox (Fig. 1). Furthermore, haemolymph  $CO_2$  content at the highest salinity is significantly different from haemolymph  $CO_2$  content at the lowest salinities ( $P < 0.005$ ; Newman-Keuls test).

While haemolymph pH changes little in control crabs over the range of salinities studied, it is raised by Diamox exposure at low, but not high, salinities (Fig. 2).

#### DISCUSSION

##### *Carbonic anhydrase activity in P. crassipes*

Our results indicate that the gills of *P. crassipes*, like that of *C. sapidus* (Aldridge, 77), contain a Diamox-sensitive catalyst of the hydration of  $CO_2$ . We assume this

catalytic activity to be due to a carbonic anhydrase. The tissue disruption and extraction experiments strongly suggest that this enzyme is located intracellularly, within the gill epithelial cells, and is in a soluble, or at most loosely membrane-associated form. Our experiments do not distinguish different intracellular pools of this enzyme. Given the extensive infolding of gill epithelial tissues (Copeland, 1968; Taylor & Butler, 1978), the possibility that the enzyme is distributed among functionally distinct subcellular compartments must be kept in mind when speculating on the function of the enzyme.

The lack of any detectable activity in haemolymph, muscle, heart, hepatopancreas and male gonads does not prove the absence of the enzyme in these tissues; it is in principle impossible to prove the absence of an *in vivo* functional enzyme using *in vitro* techniques. This caveat about the extension of *in vitro* results to *in vivo* reality also concerns the interpretation of our values for the specific activity of the gill carbonic anhydrase; all that is significant about these data are that the specific activities of gill extracts are well above zero, and that this *in vitro* activity is subject to a dose-dependent inhibition by Diamox.

We suggest that Diamox inhibits gill carbonic anhydrase *in vivo* as well as *in vitro*. This suggestion is supported by our experiments with radiolabelled Diamox, showing rapid equilibration of the label between sea water and haemolymph at Diamox concentrations which are effective in totally inhibiting carbonic anhydrase *in vitro* and by our observations that haemolymph  $\text{CO}_2$  is elevated while  $\text{O}_2$  consumption (and by inference  $\text{CO}_2$  production) is depressed. The use of  $\text{O}_2$  consumption in estimating  $\text{CO}_2$  production does, however, present some difficulties. A recent study on a land crab indicates that the ratio of  $\text{CO}_2$  production to  $\text{O}_2$  consumption (RQ) increases from 0.7–0.9 to above 1.0 when the crabs exercise (Herreid, Lee & Shah, 1979). It is impossible to evaluate changes in RQ accompanying Diamox exposure from evidence presented here. However, in the present study, even a 25% increase in RQ in Diamox-exposed crabs would not lead to  $\text{CO}_2$  production greater than in control crabs, since  $\text{O}_2$  consumption declines in the presence of Diamox by 20–25%. This makes it unlikely that changes in tissue  $\text{CO}_2$  production contribute to elevated haemolymph  $\text{CO}_2$  contents (Fig. 2). The most parsimonious explanation of our observations of elevated haemolymph  $\text{CO}_2$  is that the gill intracellular  $\text{CO}_2 \rightleftharpoons \text{HCO}_3^-$  equilibrium is: (1) critical to the  $\text{CO}_2$  excretion rate, and (2) strongly affected by intracellular carbonic anhydrase.

Another possible interpretation of the elevated haemolymph  $\text{CO}_2$  is that Diamox mobilizes  $\text{CO}_2$  from some unknown source within the crab into the haemolymph. For example, some recent evidence suggests that crabs can use internal stores of  $\text{CaCO}_3$ , presumably from the shell, to buffer the haemolymph against severe decreases in pH which may occur when a crab is exposed to air (deFur, Wilkes and McMahon, 1981). Mobilization of internal  $\text{CO}_2$  stores during Diamox exposure cannot be completely ruled out in the present study. However, a release of  $\text{CaCO}_3$  stores associated with a decrease in haemolymph pH similar to that observed by deFur *et al.* is unlikely, since pH did not decrease during exposure to Diamox in any of our experiments.

In support of our interpretation that carbonic anhydrase facilitates  $\text{CO}_2$  excretion



Table 4. *Pachygrapsus crassipes* were injected with a physiological saline in which Diamox was dissolved to achieve a final circulating concentration of  $2.7 \times 10^{-3}$  M

Control crabs received injections of physiological saline. Haemolymph was sampled three and six hours after injection. The haemolymph of each crab was sampled only once. Data are expressed as  $\bar{x} \pm \text{s.e.}$  ( $N$ ).  $P$  values according to Student's  $t$  test are given comparing experimental to control data.

| Three hours after injection              |                        |                    |                                               |                        |                      |
|------------------------------------------|------------------------|--------------------|-----------------------------------------------|------------------------|----------------------|
| Control (Ambient $\text{Cl}^- = 268$ mM) |                        |                    | Experimental (Ambient $\text{Cl}^- = 268$ mM) |                        |                      |
| pH                                       | $\text{CO}_2$ tot (mM) | $\text{Cl}^-$ (mM) | pH                                            | $\text{CO}_2$ tot (mM) | $\text{Cl}^-$ (mM)   |
| $7.709^{+0.036}$<br>$-0.033$ (6)         | $4.97 \pm 0.29$ (5)    | $378 \pm 24.7$ (3) | $7.809^{+0.057}$<br>$-0.051$ (6)              | $7.43 \pm 1.15$ (6)    | $316 \pm 29.76$ (6)  |
|                                          |                        |                    | N.S.                                          | $P < 0.05$             | N.S.                 |
| Six hours after injection                |                        |                    |                                               |                        |                      |
| Control (Ambient $\text{Cl}^- = 251$ mM) |                        |                    | Experimental (Ambient $\text{Cl}^- = 253$ mM) |                        |                      |
| pH                                       | $\text{CO}_2$ tot (mM) | $\text{Cl}^-$ (mM) | pH                                            | $\text{CO}_2$ tot (mM) | $\text{Cl}^-$ (mM)   |
| $7.844^{+0.041}$<br>$-0.038$ (7)         | $5.82 \pm 0.64$ (7)    | $332 \pm 2.06$ (6) | $8.22^{+0.03}$<br>$-0.02$ (9)                 | $16.95 \pm 1.72$ (9)   | $231^* \pm 5.34$ (8) |
|                                          |                        |                    | $P < 0.005$                                   | $P < 0.005$            | $P < 0.005$          |

\* This set of  $\text{Cl}^-$  titrations was anomalous in that slight precipitates were observed early in the titration, which then disappeared on further addition of  $\text{HgNO}_3$ . The anomaly was due to the crab haemolymph under these conditions, and not the titration solutions, since the same solution worked normally with other crab haemolymph samples.

we have recently found that Diamox inhibits the excretion of  $\text{H}^{14}\text{CO}_3^-$  added to the artificial internal perfusate of an isolated gill of *Cancer anthonyi* in organ culture (Burnett *et al.* 1980b; Woodson *et al.* 1980). The posterior gills used in these studies were found to contain Diamox-sensitive carbonic anhydrase activity.

#### Relation to prior work with Diamox in a crab

Our results with *P. crassipes* sharply contrast with those of Aldridge & Cameron (1979) who, using blue crabs (*Callinectes sapidus*) acclimated to fresh water, showed that Diamox injection had no effect on haemolymph pH or  $\text{CO}_2$  content after six hours. In an effort to explain the discrepancies between the two studies, we conducted an experiment on *P. crassipes* using methods similar to those used by Aldridge & Cameron. We acclimated the crabs to 16‰ salinity water, the lowest salinity at which they can regulate haemolymph chloride, in order to approximate both the direction and degree of chloride regulation found in *C. sapidus*. Diamox was dissolved in a physiological saline (based on Prosser *et al.* 1955) approximating the ionic content of the crab's haemolymph at 16‰ salinity. Crabs were then injected with the solution to achieve a final circulating Diamox concentration in the haemolymph of  $2.7 \times 10^{-3}$  M (after Aldridge & Cameron, 1979 and based on the assumption of haemolymph volume = 30% wet animal weight; Gleeson & Zubkoff, 1977). Haemolymph withdrawn after three hours in one group of crabs and after six hours in another group of crabs was analysed for pH,  $\text{CO}_2$  and chloride content. The results (Table 4) are consistent with our findings of an elevation in haemolymph  $\text{CO}_2$  content and inhibition of chloride regulation during Diamox exposure. Thus, the discrepancies between the results of the two studies are not likely to be due to the differences in dose or route of administration of Diamox.

■ We would like to point out, however, that Diamox, a basic compound, has been

observed to produce a non-specific effect on carbonic anhydrase activity when used more than millimolar concentrations (Maren, 1977). In addition, repeated haemolymph sampling produces slight haemolymph acidosis and lowering of  $\text{CO}_2$  content (McMahon, Butler & Taylor, 1978). Multiple haemolymph sampling (six times within 12 h) on *C. sapidus*, a crab which is normally very aggressive and excitable, may have shifted haemolymph pH and  $\text{CO}_2$  content in directions opposite to that which we observed in *P. crassipes*. Thus, both the high Diamox concentration and multiple haemolymph sampling in the Aldridge & Cameron (1979) study may have masked differences in haemolymph pH and  $\text{CO}_2$  content before and after treatment.

The results of the Aldridge & Cameron (1979) study can be explained if there was a decrease in both  $\text{CO}_2$  production and  $\text{CO}_2$  excretion.  $\text{O}_2$  uptake (and thus  $\text{CO}_2$  production) measured in two *P. crassipes* treated with Diamox in a manner similar to that used with *C. sapidus* showed no significant change after five hours (unpublished results of ours). However, the possibility of a Diamox-induced change in  $\text{CO}_2$  production in *C. sapidus* was not explored. Finally, the contrasting results of the two studies may be related to (1) species-specific differences in the function of carbonic anhydrase in crab gills or (2) the possibility that six hours exposure to Diamox is insufficient time to measure a slowly accumulating effect on haemolymph  $\text{CO}_2$  content or pH.

#### *Effects of Diamox on chloride regulation*

Diamox-sensitive chloride transport (Fig. 1) has been observed in other epithelia: gills of the goldfish (Maetz & Garcia-Romeu, 1964) and rainbow trout (Kerstetter & Kirschner, 1972), intact toadfish (Kormanik & Evans, 1979), the crayfish *Astacus leptodactylus* (Ehrenfeld, 1974), and frog skin (Ehrenfeld & Garcia-Romeu, 1978; Watlington, Jessee & Baldwin, 1977). A major observation of the present work is that Diamox affects haemolymph  $\text{CO}_2$  content most strongly in hyposaline water (Fig. 2). Thus  $\text{CO}_2$  excretion and regulation of haemolymph chlorinity under hyposaline conditions may be limited together by the rate at which either  $\text{CO}_2$  or  $\text{HCO}_3^-$  can be supplied to (or removed from) certain intracellular transport sites within the gill. This suggestion is really a multipart theory, and we will now consider its various components.

First, it must be admitted that in addition to its known effect as an inhibitor of carbonic anhydrases from numerous different species, Diamox may be a specific inhibitory ligand of the chloride inward-transporting mechanism under hyposaline conditions. We ignore this possibility only because there is lack of evidence for it, there is plenty of evidence for the carbonic anhydrase inhibition role, and finally because we do not know how to settle the problem experimentally.

Given the assumption that the sole site of action of Diamox is carbonic anhydrase, we must then consider that the enzyme is known to catalyse both the hydration of  $\text{CO}_2$  and the dehydration of  $\text{HCO}_3^-$  ( $\text{H}_2\text{CO}_3$  is probably not the substrate for the dehydration reaction; DeVoe & Kistiakowsky, 1961; Khalifah, 1971). Furthermore Diamox appears to be a competitive inhibitor of the hydration reaction but a non-competitive inhibitor of the dehydration reaction (Maren, 1967). The present data say nothing about the *in vivo* substrate or prevailing direction of catalysis. The possibility that there are different subcellular pools of the enzyme, some catalysing one reactant

and some the other, cannot be ignored either (e.g. the enzyme favours the dehydration reaction in acid media; Khalifah, 1971). Thus, we must consider that Diamox may be making the rate of supply or removal of either (or both)  $\text{CO}_2$  or  $\text{HCO}_3^-$  to intracellular sites limiting, and thereby impairing the inward transport of chloride. Clearly the number of possibilities is unpleasantly large. All we can assert, remembering our assumption about the sole site of action of Diamox, is that under hyposaline conditions the inward movement of chloride is coupled to the outward movement of  $\text{CO}_2$  in such a way that the gill intracellular  $\text{CO}_2 \rightleftharpoons \text{HCO}_3^-$  interconversion rate, as controlled by carbonic anhydrase, is critical to  $\text{CO}_2$  and  $\text{Cl}^-$  translocation processes.

#### *Diamox-induced haemolymph pH changes*

The inhibition of chloride ion regulation during Diamox exposure at low salinity is associated with an increase in haemolymph pH (Fig. 2). The alkalosis is probably an effect of the breakdown of ion regulation (and thus osmotic regulation), and not a result of carbonic anhydrase inhibition *per se*. Mangum & Towle (1977) have attributed the haemolymph alkalosis associated with the migration of *Callinectes sapidus* to dilute waters to a cellular volume regulation mechanism, in which intracellular free amino acid pools are reduced to accommodate the dilution of the haemolymph. The deamination of the free amino acid pool produces ammonia which passes into the haemolymph and picks up a proton, raising the pH. A similar situation is likely to exist in *P. crassipes* when its haemolymph suddenly becomes dilute due to a Diamox-induced inhibition of  $\text{Cl}^-$  ion regulation.

This research was supported by University of San Diego College of Arts and Sciences Faculty Research Grants to L.E.B. and P.B.J.W., and by a USD Associated Student Body Student Research Grant to V.C.V. Diamox was the kind gift of Lederle, Inc. We wish to thank David and Mary Dorman for the synthesis of radio-labelled acetazolamide and preliminary work on the enzyme assay. Thanks are due to Dr Robert Corbeil for help with statistical analyses. Finally, we wish to recognize the many students who collect and maintain crabs and help out in so many ways.

#### REFERENCES

- ALDRIDGE, J. B. (1977). Structure and respiratory function in the gills of the blue crab, *Callinectes sapidus* (Rathbun). M.A. thesis, the University of Texas at Austin.
- ALDRIDGE, J. B. & CAMERON, J. N. (1979).  $\text{CO}_2$  exchange in the blue crab, *Callinectes sapidus*, (Rathbun). *J. exp. Zool.* **207**, 321-328.
- BRADFORD, M. M. (1976). A rapid and sensitive method for the quantitation of microgram quantities of protein utilizing the principle of protein-dye binding. *Analyt. Biochem.* **72**, 248-254.
- BURNETT, L. E., CHAMBERS, G. K. & COSTER, G. M. (1980a). Gill tissue  $\text{O}_2$  uptake in crustaceans: application to the Fick principle for estimating blood flow. *Comp. Biochem. Physiol.* (In press).
- BURNETT, L. E., WOODSON, P. B. J., CULLINAN, S. J., MARTINEZ, H., MORRIS, T. & AMINI-NEJAD, E. (1980b). Organ culture of crab gills. *Am. Zool.* (abstract in press).
- CAMERON, J. N. (1971). A rapid method for determination of total carbon dioxide in small blood samples. *J. appl. Physiol.* **31**, 632-634.
- CAMERON, J. N. (1979). Excretion of  $\text{CO}_2$  in water-breathing animals—a short review. *Mar. Biol. Lett.* **1**, 3-13.
- COPELAND, D. E. (1968). Fine structure of salt and water uptake in the land-crab, *Gecarcinus lateralis*. *Am. Zool.* **8**, 417-432.

- CRANDALL, E. D. & O'Brasky, J. E. (1978). Direct evidence for participation of rat lung carbonic anhydrase in  $\text{CO}_2$  reactions. *J. clin. Invest.* **62**, 618-622.
- DEFFUR, P. L., WILKES, P. R. H. & MCMAHON, B. R. (1981). Non-equilibration acid-base status in *Cancer productus*: Role of exoskeletal carbonate buffers. *Respir. Physiol.* (in press).
- DEVOE, H. & KISTIAKOWSKY, G. B. (1961). The enzyme kinetics of carbonic anhydrase from bovine and human erythrocytes. *J. Am. chem. Soc.* **83**, 274-280.
- EFFROS, R. M., CHANG, R. S. Y. & SILVERMAN, P. (1978). Acceleration of plasma bicarbonate conversion to carbon dioxide by pulmonary carbonic anhydrase. *Science, N.Y.* **199**, 427-429.
- EHRENFELD, J. (1974). Aspects of ionic transport mechanisms in the crayfish *Astacus leptodactylus*. *J. exp. Biol.* **61**, 57-70.
- EHRENFELD, J. & GARCIA-ROMEY, F. (1978). Coupling between chloride absorption and base excretion in isolated skin of *Rana esculenta*. *Am. J. Physiol.* **235**, F33-F39.
- GLEESON, R. A. & ZUBKOFF, R. L. (1977). The determination of hemolymph volume in the blue crab, *Callinectes sapidus* utilizing  $^{14}\text{C}$ -thiocyanate. *Comp. Biochem. Physiol.* **56 A**, 411-413.
- HASWELL, S. M., RANDALL, D. J. & PERRY, S. F. (1980). Fish gill carbonic anhydrase: acid-base regulation or salt transport? *Am. J. Physiol.* **7**, R240-R245.
- HERREID, C. F., LEE, L. W. & SHAH, G. M. (1979). Respiration and heart rate in exercising land crabs. *Respir. Physiol.* **36**, 109-120.
- KERSTETTER, T. H. & KIRSCHNER, L. B. (1972). Active chloride transport by the gills of rainbow trout *Salmo gairdneri*. *J. exp. Biol.* **56**, 263-272.
- KHALIFAH, R. G. (1971). The carbon dioxide hydration activity of carbonic anhydrase. *J. biol. Chem.* **246**, 2561-2573.
- KLOCKE, R. A. (1977). Catalysis of pulmonary  $\text{CO}_2$  exchange. *The Physiologist* **20**, 52 (abstract).
- KORMANIK, G. A. & EVANS, D. H. (1979).  $\text{HCO}_3^-$ -stimulated  $\text{Cl}^-$  efflux in the gulf toadfish acclimated to sea water. *J. exp. Zool.* **208**, 13-16.
- MAETZ, J. & GARCIA-ROMEY, F. (1964). The mechanism of sodium and chloride uptake by the gills of a freshwater fish, *Carassius auratus*. II. Evidence for  $\text{NH}_4^+/\text{Na}^+$  and  $\text{HCO}_3^-/\text{Cl}^-$  exchanges. *J. gen. Physiol.* **47**, 1209-1227.
- MANGUM, C. P. & TOWLE, D. W. (1977). Physiological adaptation to unstable environments. *Am. Scientist* **65**, 67-75.
- MAREN, T. H. (1967). Carbonic anhydrase: chemistry, physiology and inhibition. *Physiol. Rev.* **47**, 595-781.
- MAREN, T. H. (1977). Use of inhibitors in physiological studies of carbonic anhydrase. *Am. J. Physiol.* **232**, F291-F297.
- MCMAHON, B. R., BUTLER, P. J. & TAYLOR, E. W. (1978). Acid-base changes during recovery from disturbance and during long term hypoxic exposure in the lobster *Homarus vulgaris*. *J. exp. Zool.* **205**, 361-370.
- PROSSER, C. L., GREEN, J. W. & CHOW, T. J. (1955). Ionic and osmotic concentrations in blood and urine of *Pachygrapsus crassipes* acclimated to different salinities. *Biol. Bull. mar. biol. lab., Woods Hole* **109**, 99-107.
- ROBLIN, R. O., JR. & CLAPP, J. W. (1950). Preparation of heterocyclic sulfonamides. *J. Am. chem. Soc.* **72**, 4890-4892.
- ROUGHTON, F. J. W. (1964). Transport of oxygen and carbon dioxide. In *Handbook of Physiology-Respiration*. I. Washington, D.C.: American Physiological Society.
- SCHALES, O. & SCHALES, S. S. (1952). A simple and accurate method for determination of chloride in serum or other biological fluids. *J. Biochem.* **52**, 502.
- TAYLOR, E. W. & BUTLER, P. J. (1978). Aquatic and aerial respiration in the shore crab *Carcinus maenas* (L.), acclimated to 15 °C. *J. Comp. Physiol.* **127**, 315-323.
- WATLINGTON, C. O., JESSEE, S. D. & BALDWIN, G. (1977). Ouabain, acetazolamide and  $\text{Cl}^-$  flux in isolated frog skin: evidence for two distinct active  $\text{Cl}^-$  transport mechanisms. *Am. J. Physiol.* **232**, F550-F558.
- WOODSON, P. B., BURNETT, L. E., CULLINAN, S. J. & ALBERICO, C. (1980). Carbonic anhydrase and  $\text{CO}_2$  excretion by crab gills in organ culture. *Am. Zool.* (abstract in press).
